# Supplementary material for: Intrinsic enhancement of the rate capability and suppression of the phase transition via p-type doping in Fe–Mn based P2-type cathodes used for sodium ion batteries
Source: Royal Society of Chemistry journal article supplement (doi:10.1039/d0cp06483a), 2021-01-01
Supplement: d0cp06483a1.pdf [file d0cp06483a1.pdf]

## Electronic Supporting Information

### **Intrinsic enhancement of the rate capability and suppression of the phase transition via p-type doping in Fe-Mn based P2-type cathodes used for sodium ion batteries**

Taeseon Hwang<sup>†a</sup>, Jin-Myoung Lim<sup>†a,b</sup>, Rye-Gyeong Oh<sup>c</sup>, Woosuk Cho<sup>c</sup>, Maenghyo Cho<sup>\*a</sup> and Kyeongjae Cho<sup>\*d</sup>

<sup>a</sup> *Department of Mechanical and Aerospace Engineering, Seoul National University, 1 Gwanak-ro, Gwanak-gu, Seoul 08826, Republic of Korea. E-mail: [mhcho@snu.ac.kr](mailto:mhcho@snu.ac.kr).*

<sup>b</sup> *Department of Materials Science and Engineering, Northwestern University, Evanston, IL 60208, USA.*

<sup>c</sup> *Advanced Batteries Research Center, Korea Electronics Technology Institute, 25 Saenari-ro, Bundang-gu, Seongnam 13509, Republic of Korea.*

<sup>d</sup> *Department of Materials Science and Engineering, University of Texas at Dallas, Richardson, TX 75080, USA. E-mail: [kjcho@utdallas.edu](mailto:kjcho@utdallas.edu).*

<sup>†</sup> *These authors contributed equally.*

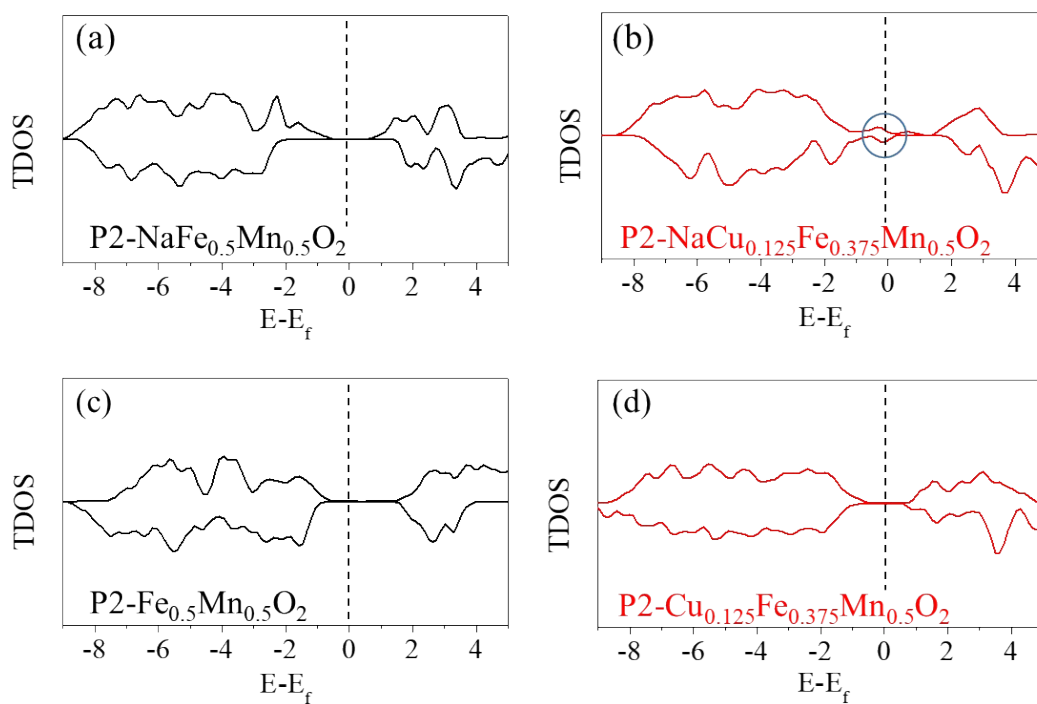

**Fig. S1** TDOS of (a) P2-NaFe<sub>0.5</sub>Mn<sub>0.5</sub>O<sub>2</sub>, (b) P2-NaCu<sub>0.125</sub>Fe<sub>0.375</sub>Mn<sub>0.5</sub>O<sub>2</sub>, (c) P2-Fe<sub>0.5</sub>Mn<sub>0.5</sub>O<sub>2</sub>, and (d) P2-Cu<sub>0.125</sub>Fe<sub>0.375</sub>Mn<sub>0.5</sub>O<sub>2</sub> with HSE06 hybrid functional (dotted line indicates the Fermi level).

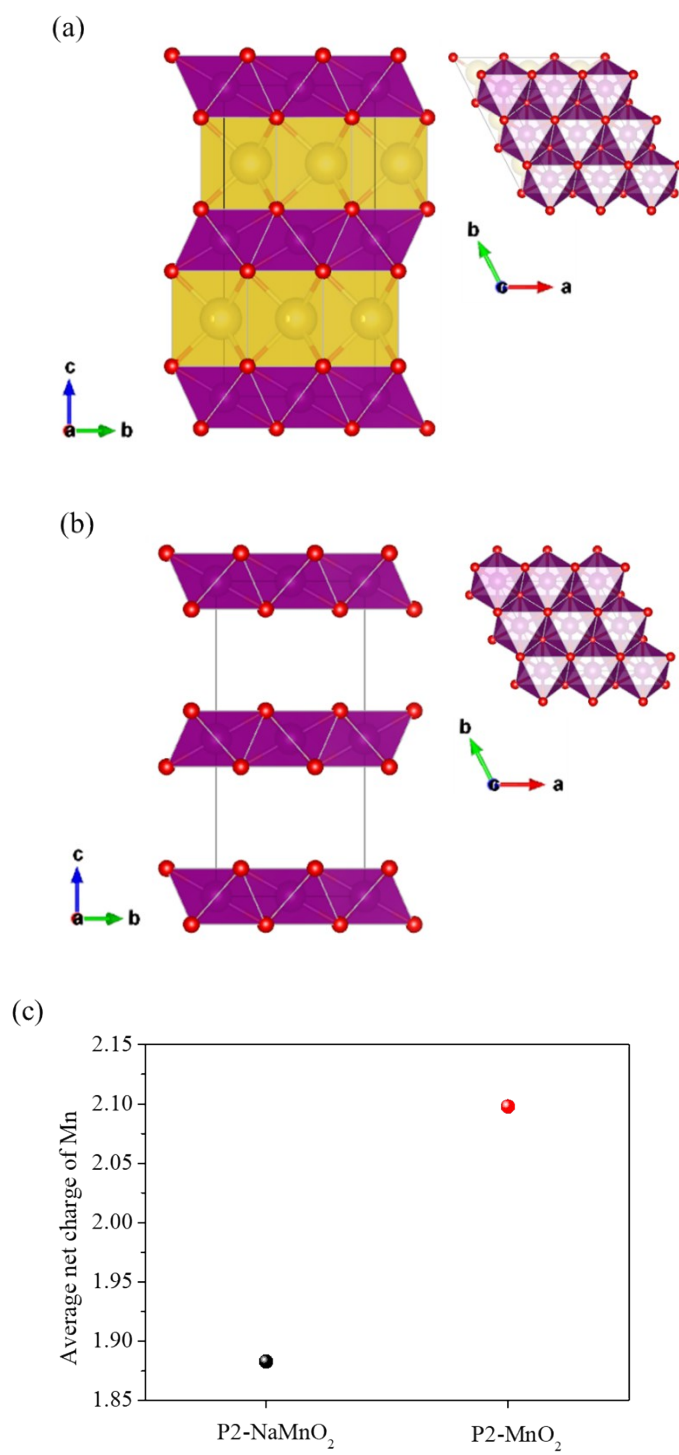

**Fig. S2** (a, b) Atomic structures and (c) Average net charges of Mn in P2-NaMnO<sub>2</sub> and P2-MnO<sub>2</sub>.

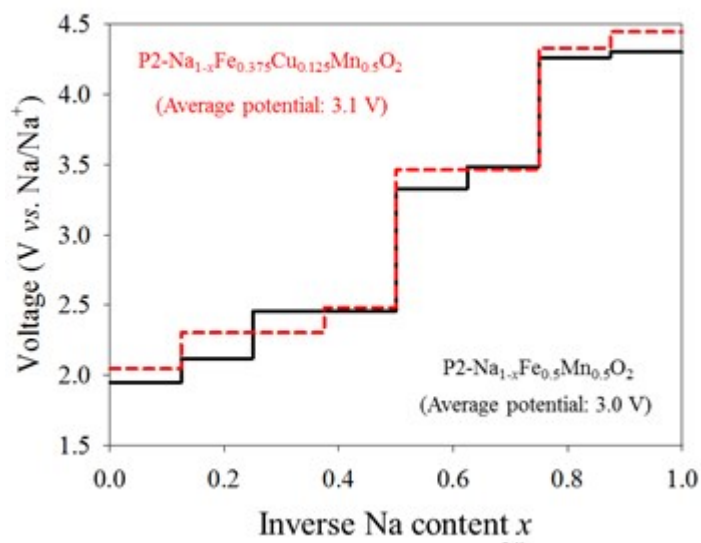

**Fig. S3** Calculated electrochemical potential with respect to the inverse Na content  $x$  in P2-Na<sub>1-x</sub>Fe<sub>0.5</sub>Mn<sub>0.5</sub>O<sub>2</sub> (black) and P2-Na<sub>1-x</sub>Cu<sub>0.125</sub>Fe<sub>0.375</sub>Mn<sub>0.5</sub>O<sub>2</sub> (red).

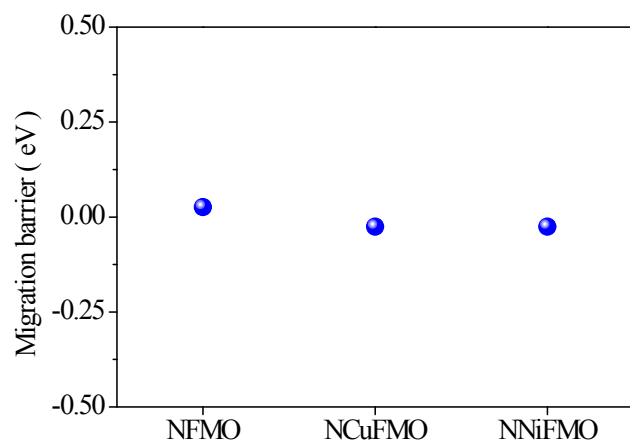

**Fig. S4** Migration barrier from P2 to OP2.

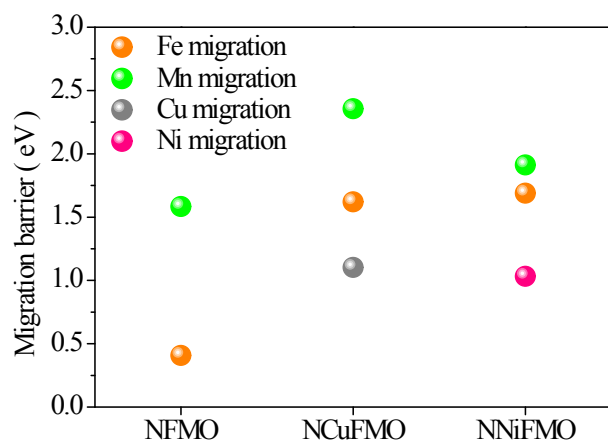

**Fig. S5** Migration barrier from OP2 to Z.

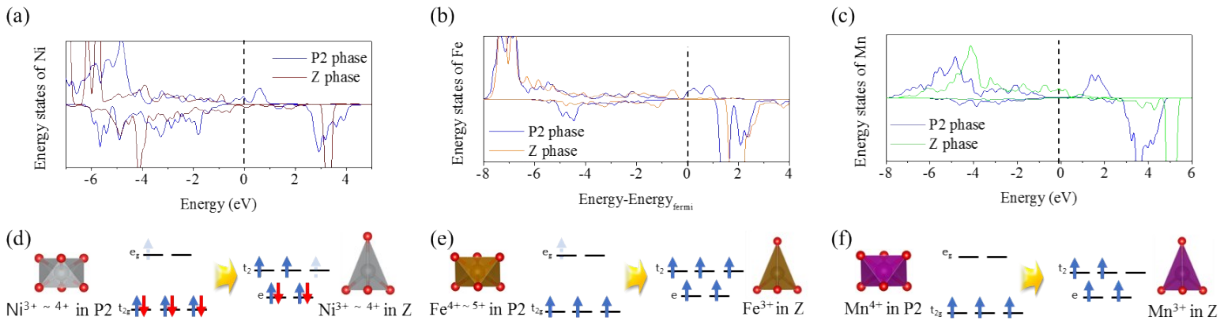

**Fig. S6** (a-c) PDOS for (a)Ni, (b)Fe, (c)Mn and CFSDs of (d)Cu, (e)Fe, (f)Mn in NNiFMO. (Solid arrow : fully filled state, shaded arrow : partially filled state)

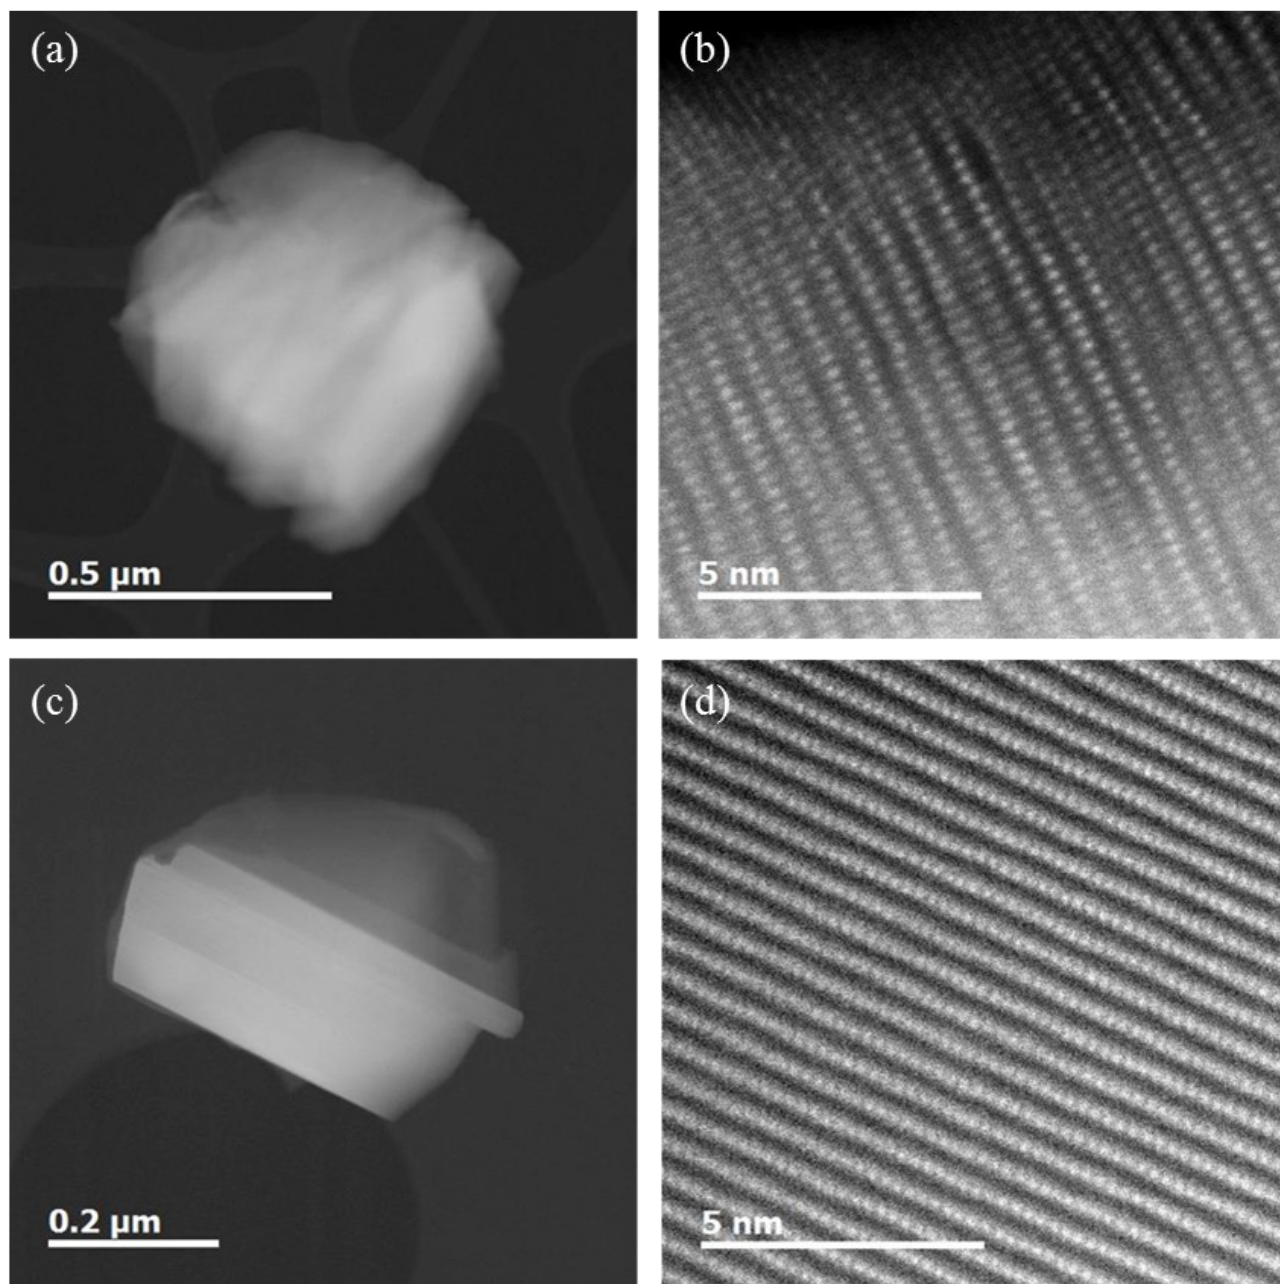

**Fig. S7** STEM images of (a, b) P2-Na<sub>0.67</sub>Fe<sub>0.5</sub>Mn<sub>0.5</sub>O<sub>2</sub> and (c, d) P2-Na<sub>0.67</sub>Cu<sub>0.125</sub>Fe<sub>0.375</sub>Mn<sub>0.5</sub>O<sub>2</sub>.

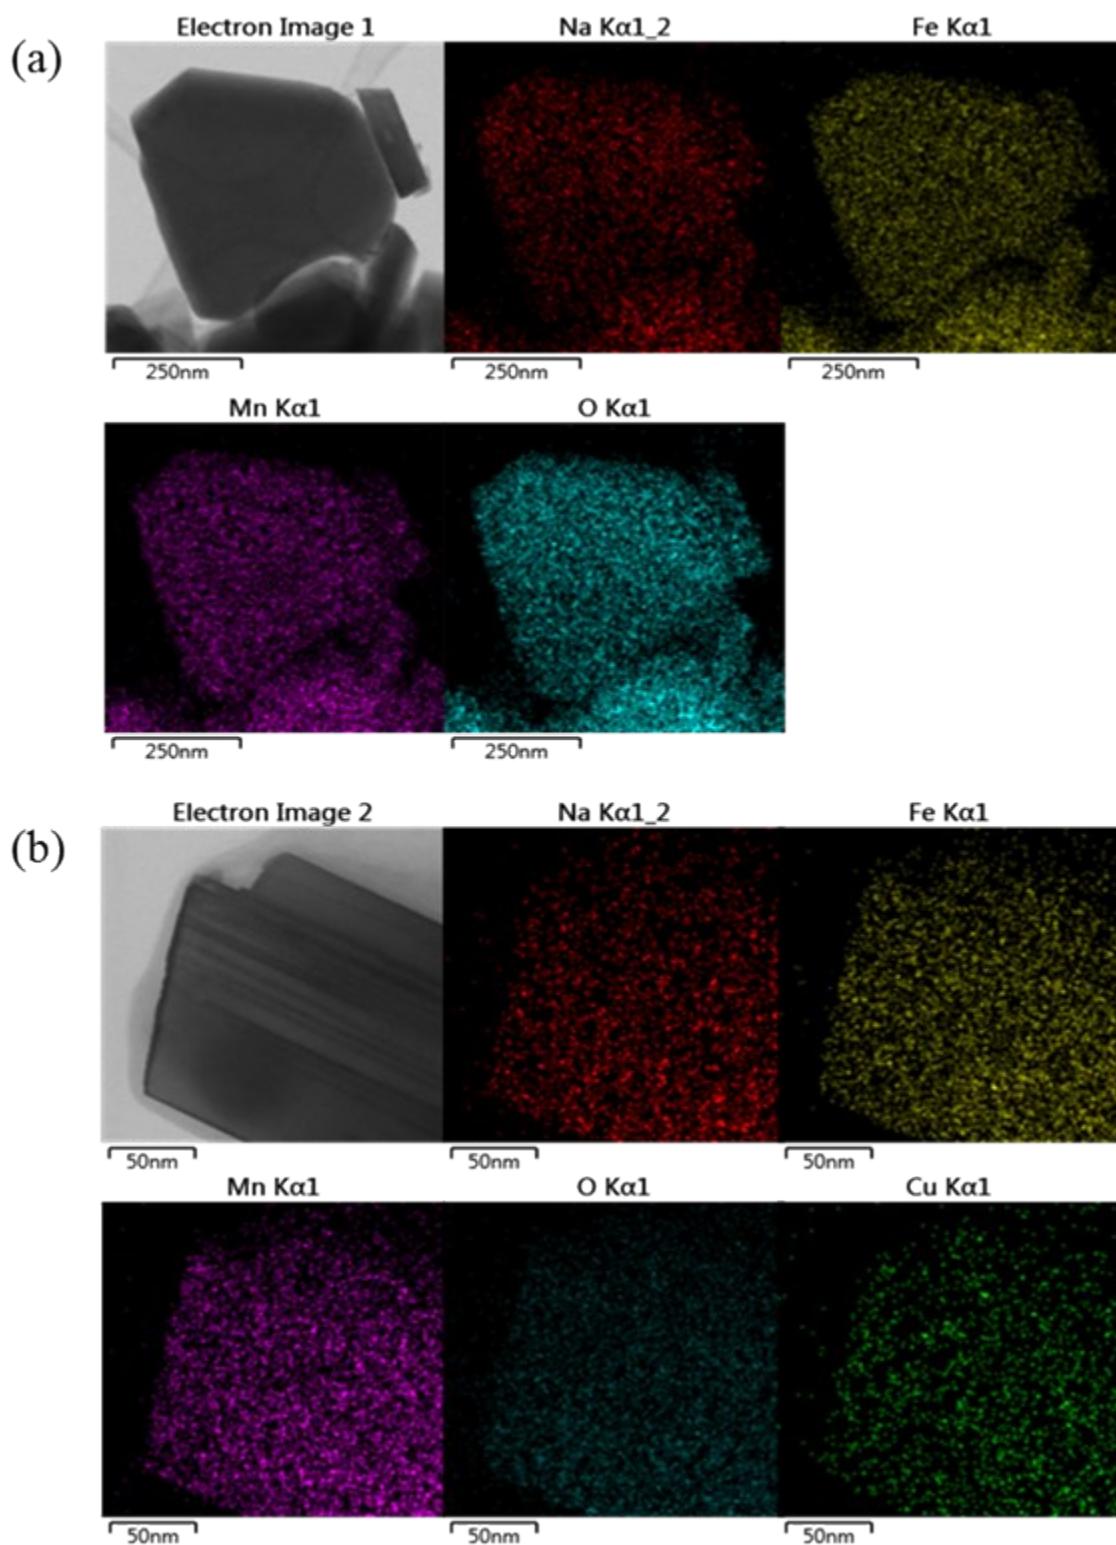

**Fig. S8** Elemental distributions of Na (red), Fe (yellow), Mn (purple), O (cyan) and Cu (green) for (a) P2- $\text{Na}_{0.67}\text{Fe}_{0.5}\text{Mn}_{0.5}\text{O}_2$  and (b) P2- $\text{Na}_{0.67}\text{Cu}_{0.125}\text{Fe}_{0.375}\text{Mn}_{0.5}\text{O}_2$  measured by HRTEM with EDS analysis.



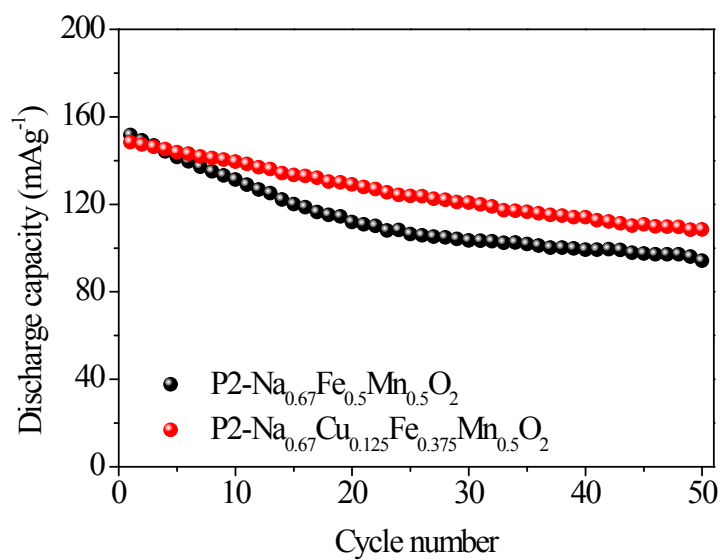

**Fig. S9** Cycle performance of P2-Na<sub>0.67</sub>Fe<sub>0.5</sub>Mn<sub>0.5</sub>O<sub>2</sub> (black) and P2-Na<sub>0.67</sub>Cu<sub>0.125</sub>Fe<sub>0.375</sub>Mn<sub>0.5</sub>O<sub>2</sub> (red) at 100 mA g<sup>-1</sup> in the range of 1.5 to 4.3 V vs. Na/Na<sup>+</sup>.

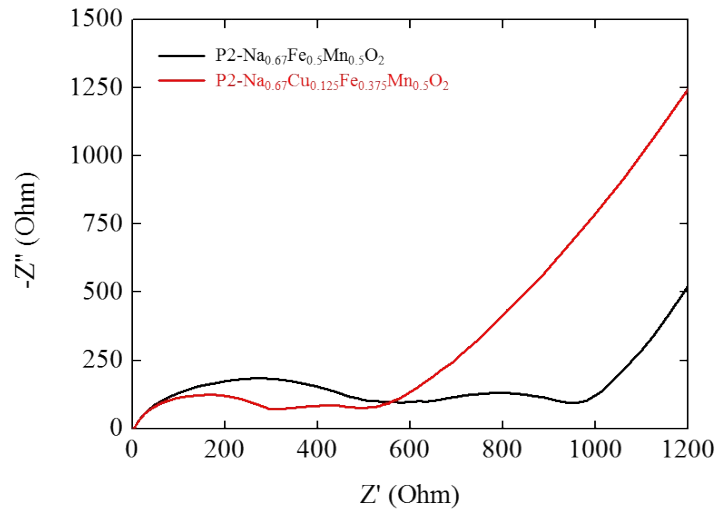

**Fig. S10** Electrochemical impedance spectroscopy profiles of  $\text{P2-Na}_{0.67}\text{Fe}_{0.5}\text{Mn}_{0.5}\text{O}_2$  (black) and  $\text{P2-Na}_{0.67}\text{Cu}_{0.125}\text{Fe}_{0.375}\text{Mn}_{0.5}\text{O}_2$  (red) at the OCV(Open circuit voltage) states.

**Table. S1** Net charges of transition metal elements according to various migration states in NFMO, NCuFMO and NNiFMO.

|        |    | P2 phase | Z phase by<br>Fe migration | Z phase by<br>Mn migration | Z phase by<br>Cu migration | Z phase by<br>Ni migration |
|--------|----|----------|----------------------------|----------------------------|----------------------------|----------------------------|
| NFMO   | Fe | 1.99     | 1.92                       | 1.95                       |                            |                            |
|        | Mn | 2.11     | 2.11                       | 1.78                       |                            |                            |
| NCuFMO | Fe | 2.03     | 1.93                       | 2.03                       | 2.03                       |                            |
|        | Mn | 2.10     | 2.12                       | 1.84                       | 2.11                       |                            |
|        | Cu | 1.28     | 1.28                       | 1.29                       | 1.29                       |                            |
| NNiFMO | Fe | 2.03     | 1.93                       | 2.03                       |                            | 2.03                       |
|        | Mn | 2.10     | 2.11                       | 1.79                       |                            | 2.12                       |
|        | Ni | 1.42     | 1.49                       | 1.44                       |                            | 1.36                       |

**Table. S2**  $a$  and  $c$  lattice parameters calculated by both XRD and DFT calculation of P2- $\text{Na}_{0.67}\text{Fe}_{0.5}\text{Mn}_{0.5}\text{O}_2$  and P2- $\text{Na}_{0.67}\text{Cu}_{0.125}\text{Fe}_{0.375}\text{Mn}_{0.5}\text{O}_2$ .

|                 |                                                                                   | $a$ (Å) | $c$ (Å) |
|-----------------|-----------------------------------------------------------------------------------|---------|---------|
| XRD             | P2- $\text{Na}_{0.67}\text{Fe}_{0.5}\text{Mn}_{0.5}\text{O}_2$                    | 2.917   | 11.294  |
|                 | P2- $\text{Na}_{0.67}\text{Cu}_{0.125}\text{Fe}_{0.375}\text{Mn}_{0.5}\text{O}_2$ | 2.918   | 11.223  |
| DFT calculation | P2- $\text{Na}_{0.63}\text{Fe}_{0.5}\text{Mn}_{0.5}\text{O}_2$                    | 2.987   | 11.231  |
|                 | P2- $\text{Na}_{0.63}\text{Cu}_{0.125}\text{Fe}_{0.375}\text{Mn}_{0.5}\text{O}_2$ | 2.96    | 11.225  |
